# Supplementary material for: Propofol inhibits stromatoxin-1-sensitive voltage-dependent K+ channels in pancreatic β-cells and enhances insulin secretion
Source: PeerJ. 2019 Dec 2;7:e8157. doi: 10.7717/peerj.8157 (PMC6894434; doi:10.7717/peerj.8157)
Supplement: Data S1 [file peerj-07-8157-s012.xlsx]

## Sheet: Fig 1A
2mM 0	2mM 5	2mM 10	2mM 25	2mM 50	2mM 100
105.513	71.564	131.864	135.521	135.008	97.6304
100.651	117.125	125.21	125.016	150.739	77.8831
103.082	125.024	122.907	148.957	151.622	112.67

## Sheet: Fig 1B
2mM 0	2mM 5	2mM 10	2mM 25	2mM 50	2mM 100
81.8326	111.564	141.864	145.521	125.008	97.6304
94.4708	137.125	135.21	150.016	144.739	77.8831
123.697	145.024	142.907	148.957	132.622	72.6699

## Sheet: Fig 1C
2mM 0	2mM 5	2mM 10	2mM 25	2mM 50	2mM 100
109.896	107.197	115.862	90.6689	86.6859	73.1918
95.8618	123.288	122.31	100.845	100.72	75.3728
94.2425	114.754	130.64	96.9413	80.4185	98.5606

## Sheet: Fig 1D
20mM 0	20mM 5	20mM 10	20mM 25	20mM 50	20mM 100
645.85	687.02	756.22	838.86	822.23	664.13
638.19	681.43	841.36	869.56	773.53	662.55
784.23	863.03	852.76	934.17	886.76	584.37

## Sheet: Fig 1E
20mM 0	20mM 5	20mM 10	20mM 25	20mM 50	20mM 100
558.689	687.678	723.223	938.863	822.749	364.139
608.199	681.359	941.233	974.566	873.46	422.56
720.22	863.034	952.291	1027.17	943.76	354.376

## Sheet: Fig 1F
20mM 0	20mM 5	20mM 10	20mM 25	20mM 50	20mM 100
802.26	880.633	1163.38	911.508	717.632	416.765
539.827	704.887	903.512	681.137	714.386	501.765
742.886	866.384	863.573	659.763	742.886	299.83

## Sheet: Fig 1G
2mM 0	20mM 0	20mM 25	20mM 50	20mM 100		20mM 25 6h	20mM 50 6h	20mM 1006h
156.25	383.125	682.5	468.125	121.25	573.125	536.25	654.375	281.875
145.625	563.75	671.25	379.375	129.375	463.75	531.25	452.5	257.5
146.25	380	475.625	477.5	130	480	546.25	358.75	230.625
166.875	386.875	410	472.5	203.75	456.875	521.25	670	271.25
135.625	593.75	708.75	569.375	203.75	553.42	490	560.875	266.875
123.75	386.25	527.5	369.375	199.375	432.25	488.75	564.375	246.875
165	505	558.125	288.75	96.25	513.4	576.25	565	312.5
173.125	543.125	535	393.75	94.375	397.125	579.375	447.5	310
146.25	473.75	546.875	484.375	81.875	462.75	569.375	551.875	321.25

## Sheet: Fig 1H
2mM 0	2mM 5	2mM 10	2mM 25	2mM 50	2mM 100
108.049	111.402	146.278	205.299	187.861	152.985
101.342	123.554	157.957	193.227	225.42	137.559
90.6107	136.889	161.034	196.58	203.958	160.363

## Sheet: Fig 1I
20mM 0	20mM 5	20mM 10	20mM 25	20mM 50	20mM 100
658.842	819.272	1238.86	1292.85	1116.99	666.555
560.116	720.546	1206.46	1306.73	1369.98	777.622
574	729.802	956.563	1195.67	1245.03	530.807

## Sheet: Fig 2A
2mM_Con_D-	2mM_P10_D-	2mM_P25_D-	2mM_P50_D-	2mM_Con_D+	2mM_P10_D+	2mM_P25_D+	2mM_P50_D+
111.45	100	136.26	185.878	42.7481	63.7405	78.4733	94.2749
69.4657	52.2901	107.634	180.153	50.9161	44.6565	82.7481	89.4657
119.084	103.817	124.809	90.4581	48.5497	71.2977	78.4733	88.5497

[truncated: 30 more sheets: Fig 2B, Fig 2C, Fig 2D, Fig 3A, Fig 3B, Fig 3C, Fig 3D, Fig 3E, Fig 3F, Fig 3G, Fig 4A, Fig 4B, Fig 4C, Fig 5A, Fig 5B, Fig 5C, Fig 7A, Fig 7B, Fig 7C, Fig 7D …]
