# Supplementary material for: Propofol inhibits stromatoxin-1-sensitive voltage-dependent K+ channels in pancreatic β-cells and enhances insulin secretion
Source: PeerJ. 2019 Dec 2;7:e8157. doi: 10.7717/peerj.8157 (PMC6894434; doi:10.7717/peerj.8157)
Supplement: Table S1 [file peerj-07-8157-s001.xlsx]

## Sheet: materials
S1 Table Key Resources Table.
Reagents	Source	Identifier
2,4-diisopropylphenol	Sigma-Aldrich	557811
2,6-diisopropylphenol (propofol)	Sigma-Aldrich	D126608
45w/v% D(+)-Glucose	Wako	079-05511
ADP Assay Kit	abcam	ab83359
albumin from bovine serum (BSA), fatty acid free	Wako	017-15141
Anti-β-Actin pAb	MBL	PM053
Anti-Kv2.1 Antibody	Alomone Labs	APC-012
Anti-Rabbit IgG	GE Healthcare	NA934
Apo-ONE Homogeneous Caspase-3/7 Assay Kit	Promega	G7792
Camptothecine	Sigma-Aldrich	C9911
CellTiter-Glo luminescent cell viability assay kit	Promega	G7570
diazoxide	Wako	047-23133
Dimetyl Sulfoxide	Nacalai Tesque	13406-55
Dulbecco’s modified Eagle’s medium	Thermo Fisher Scientific	11965-092
ethylenediamine tetraacetic acid (EDTA)	Dojindo	H001
fetal bovine serum	GE Healthcare	SH30910
glibenclamide	Wako	078-03881
gramicidin D	Sigma-Aldrich	G5002
HEPES	Nacalai Tesque	17557-94
K2ATP	Sigma-Aldrich	A8937
KCl	Wako	163-03545
KH2PO4	Wako	7778-77-0
KOH	Nacalai Tesque	28616-45
L-glutamine	Nacalai Tesque	16948-04
Lidocaine	TERUMO	2129409G1036
MgSO4	Wako	132-00435
NaCl	Wako	191-01665
NaH2PO4・2H2O	Wako	192-02815
NaHCO3	Nacalai Tesque	312-13
NaOH	Sigma-Aldrich	28-3010-5
penicillin-streptomycin	Nacalai Tesque	09367-34
potassium aspartate	Sigma-Aldrich	A6558
RPMI medium	Thermo Fisher Scientific	11875-093
sodium pyruvate	Nacalai Tesque	06977-34
stromatoxin-1	Alomone Labs	STS-350
β-Mercaptoethanol	Wako	131-14572
Reagents	Source	Identifier
RIPA Buffer	Wako	182-02451
cOmplete ULTRA Tablets, Mini, EASYpack	Roche	05892970001
Protein Assay Reagent A	BIO-RAD	5000113
Protein Assay Reagent B	BIO-RAD	5000114
Protein Assay Reagent S	BIO-RAD	5000115
7.5% Mini-PROTEAN® TGXTM Precast Protein Gels	BIO-RAD	4561025									dexmedetomidine
Running Buffer Solution (10x) for SDS-PAGE	Nacalai Tesque	30329-61									8-Br-cAMP		Sigma-Aldrich	B7880
Methanol	Sigma-Aldrich	322415
Running Buffer Solution (10x) for PAGE	Nacalai Tesque	30340-91
Tris Buffered Saline with Tween® 20 (TBS-T) Tablets, pH7.6	TaKaRa	T9142
Blocking One	Nacalai Tesque	03953-95
ECLTM Prime Western Blotting Detection Reagents	GE Healthcare	RPN2232
RNeasy Mini Kit	Qiagen	74104
QuantiTectTM Reverse Transcription Kit	Qiagen	205311
KAPA HiFi HotStart ReadyMix	Kapa Biosystems	KK2601
