# Supplementary material for: Propofol inhibits stromatoxin-1-sensitive voltage-dependent K+ channels in pancreatic β-cells and enhances insulin secretion
Source: PeerJ. 2019 Dec 2;7:e8157. doi: 10.7717/peerj.8157 (PMC6894434; doi:10.7717/peerj.8157)
Supplement: Table S2 [file peerj-07-8157-s002.xlsx]

## Sheet: Sheet1
S2 Table Primer sequence for RT-PCR
Gene	forward primer	reverse primer
Slc2a2 (Glut2)	5'-TCAGAAGACAAGATCACCGGA-3'	5'-GCTGGTGTGACTGTAAGTGGG-3'
Cacna1c (Cav1.2)	5'-GAAGGCACTGAGAGCGTTCC-3'	5'-GCTCCAGGCCGATAATAGCAT-3'
Kcnj11 (Kir6.2)	5'-GACATCCCCATGGAGAATGG-3'	5'-TCGATGACGTGGTAGATGATGAG-3'
Kcnb1 (Kv2.1)	5'-AGAAACACACAGCAATAGCGT-3'	5'-GTACTCCCGTGGAGACTCTTG-3'
Abcc9 (SUR2)	5'-ACCGGAGTGCAATCAAAACC-3'	5'-AAACCACTGCCCCATGAGAA-3'
Ins1 (Insulin)	5'-CCCTTAGTGACCAGCTATAATCAGAGA-3'	5'-ACCACAAAGATGCTGTTTGACAA-3'
